# Supplementary material for: Lipidic Aminoglycoside Derivatives: A New Class of Immunomodulators Inducing a Potent Innate Immune Stimulation
Source: PubMed Central journal article supplement (PMC6702646; doi:10.1002/advs.201900288), 2019-07-15
Supplement: ADVS-6-1900288-s001.pdf [file ADVS-6-1900288-s001.pdf]

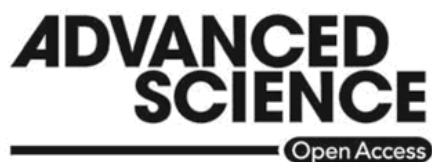

## Supporting Information

for *Adv. Sci.*, DOI: 10.1002/adv.201900288

**Lipidic Aminoglycoside Derivatives: A New Class of Immunomodulators Inducing a Potent Innate Immune Stimulation**

*Thibault Colombani, Thomas Haudebourg, Marion Decossas, Olivier Lambert, Grace Ada Da Silva, Frederic Altare, and Bruno Pitard\**

## Supporting Information

### **Lipidic Aminoglycoside Derivatives: a New Class of Immunomodulators Inducing a Potent Innate Immune Stimulation.**

*Thibault Colombani, Thomas Haudebourg, Marion Decossas, Olivier Lambert, Grace Ada Da Silva, Frederic Altare, and Bruno Pitard.\**

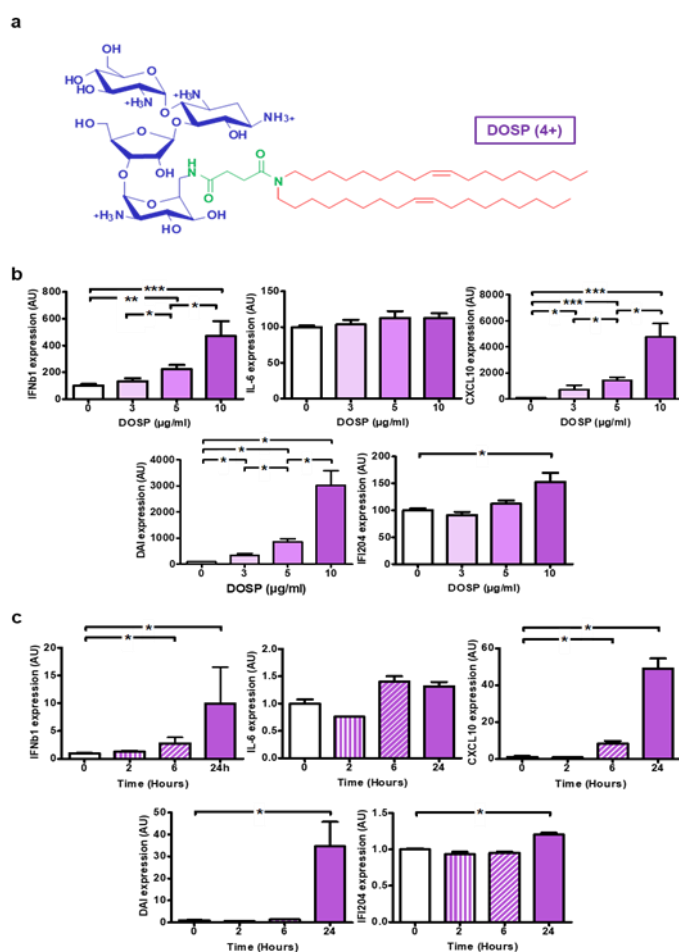

**Figure S1. Effect of DOSP on cell immune response.** (a) Structure of Di-Oleoyl-Succinyl-Paromomycin (DOSP). (b-c) Effect of DOSP on the expression of innate immune genes as a function of (b) the concentration or (c) the duration of treatment. (b) Mouse myoblast cells (n=6) were incubated for 24 hours with DOSP at a concentration of 0 to 10  $\mu\text{g}/\text{mL}$ . (c) Mouse myoblast cells (n=4) were not incubated or incubated for 2, 6 or 24 hours with DOSP at a concentration of 10  $\mu\text{g}/\text{mL}$ . Cytokine (IFN $\beta$ 1 and IL-6), chemokine (CXCL10) and DNA sensor (DAI and IFI204) expression levels in cells were determined by RT-qPCR analysis, normalized against the expression levels of HPRT (housekeeping gene) and compared to non-treated cells (AU=1). Data are expressed as the  $2^{-\Delta\Delta\text{CT}}$  formula and are shown as mean  $\pm$  SEM. Values are shown as mean  $\pm$  SEM. Data were analyzed using Mann-Whitney test, \* $p < 0.05$ , \*\* $p < 0.01$ , and \*\*\* $p < 0.001$ .

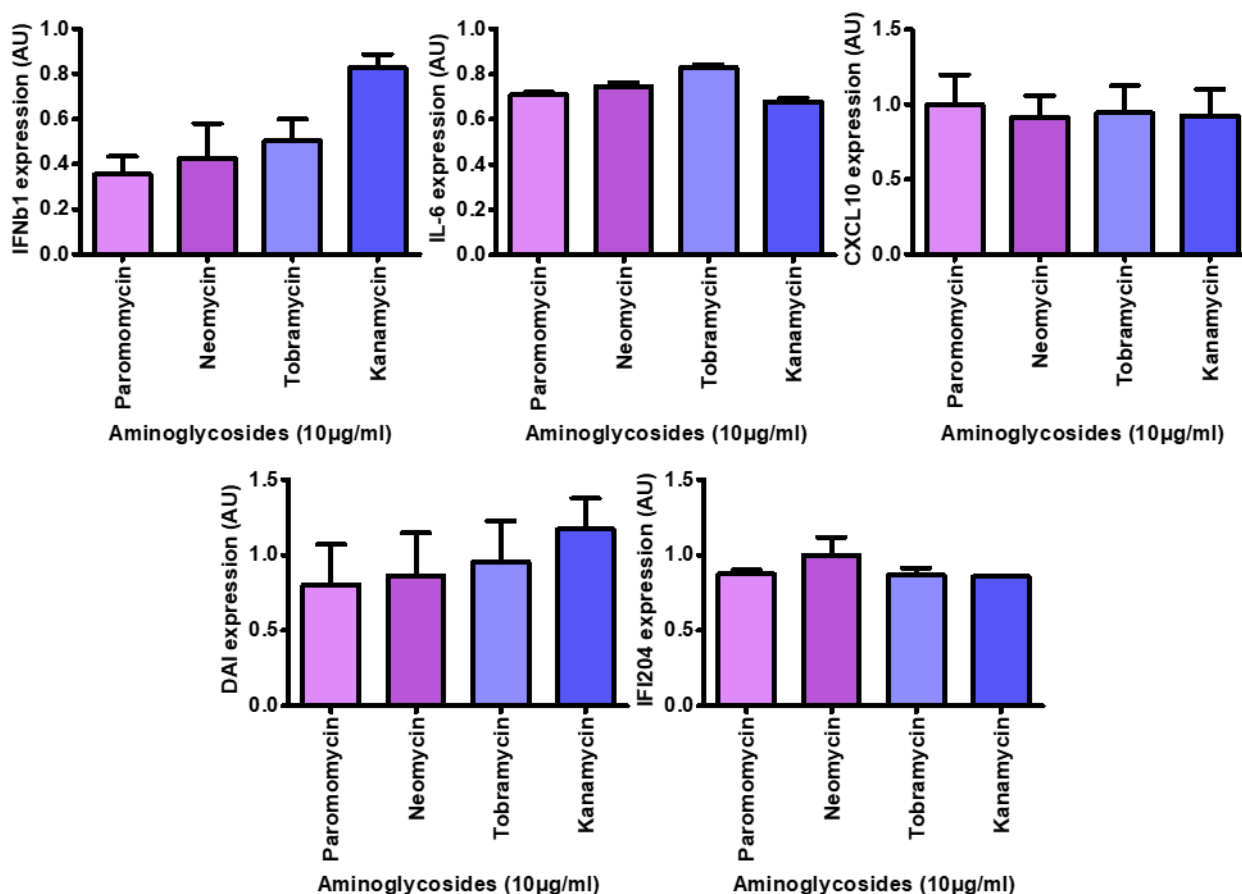

**Figure S2. Effect of aminoglycosides alone on cell immunity.** Induction of innate immune gene expression by aminoglycosides in C2C12 cells. Mouse myoblast cells (n=4) were incubated for 24 hours with 10 $\mu$ g/mL of paromomycin, neomycin B, tobramycin or kanamycin A belonging to the 4,5-disubstituted 2-deoxystreptamine ring subclass or 4,6-disubstituted 2-deoxystreptamine ring subclass respectively. Cytokine (IFN $\beta$ 1 and IL-6), chemokine (CXCL10) and DNA sensor (DAI and IFI204) expression levels in cells were determined by RT-qPCR analysis, normalized against the expression levels of HPRT (housekeeping gene) and compared to non-treated cells (AU=1). Values are shown as mean  $\pm$  SEM. Data were analyzed using Mann-Whitney test, \*p<0.05.

a

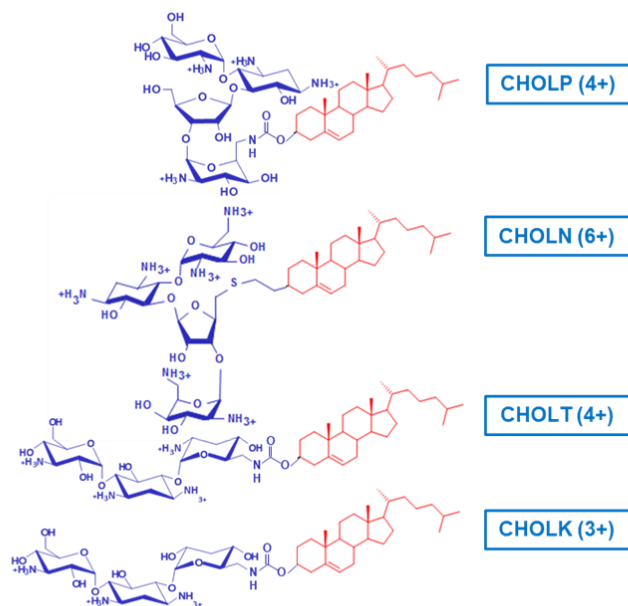

b

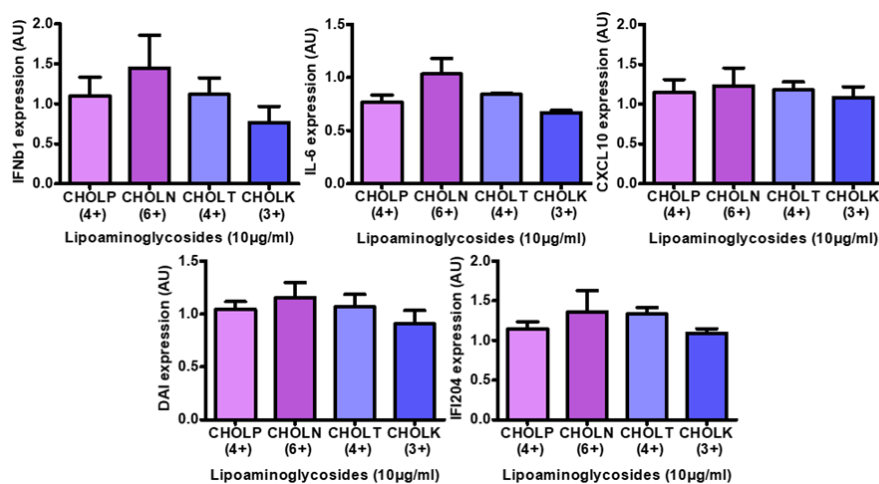

c

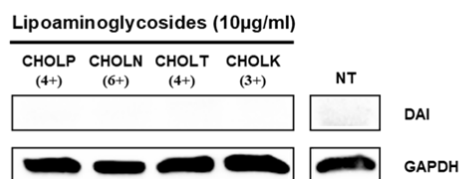

**Figure S3. Cholesterol-derived aminoglycosides failed to induce cell stimulation.** (a)

Structure of Cholesterol derived cationic lipids: CHOLT (Cholesterol-Tobramycin), CHOLK (Cholesterol-Kanamycin A), CHOLP (Cholesterol-Paromomycin) and CHOLN (Cholesterol-Neomycin B). (b-c) Stimulation of innate immune response by Cholesterol derived cationic lipids in C2C12 cells. Mouse myoblast cells (n=4) were incubated for 24 hours with 10 µg/mL of CHOLP, CHOLN, CHOLT or CHOLK, belonging to the 4,5-disubstituted 2-deoxystreptamine ring subclass or 4,6-disubstituted 2-deoxystreptamine ring subclass

respectively. (b) Cytokine (IFN $\beta$ 1 and IL-6), chemokine (CXCL10) and DNA sensor (DAI and IFI204) expression levels in cells were determined by RT-qPCR analysis, normalized against the expression levels of HPRT (housekeeping gene) and compared to non-treated cells (AU=1). Data are expressed as the  $2^{-\Delta\Delta CT}$  formula. (c) DAI DNA sensor proteins contained into cells were determined by Western Blot analysis and the level of GAPDH was used as a protein loading control. Values are shown as mean  $\pm$  SEM. Data were analyzed using Mann-Whitney test, \* $p < 0.05$ .

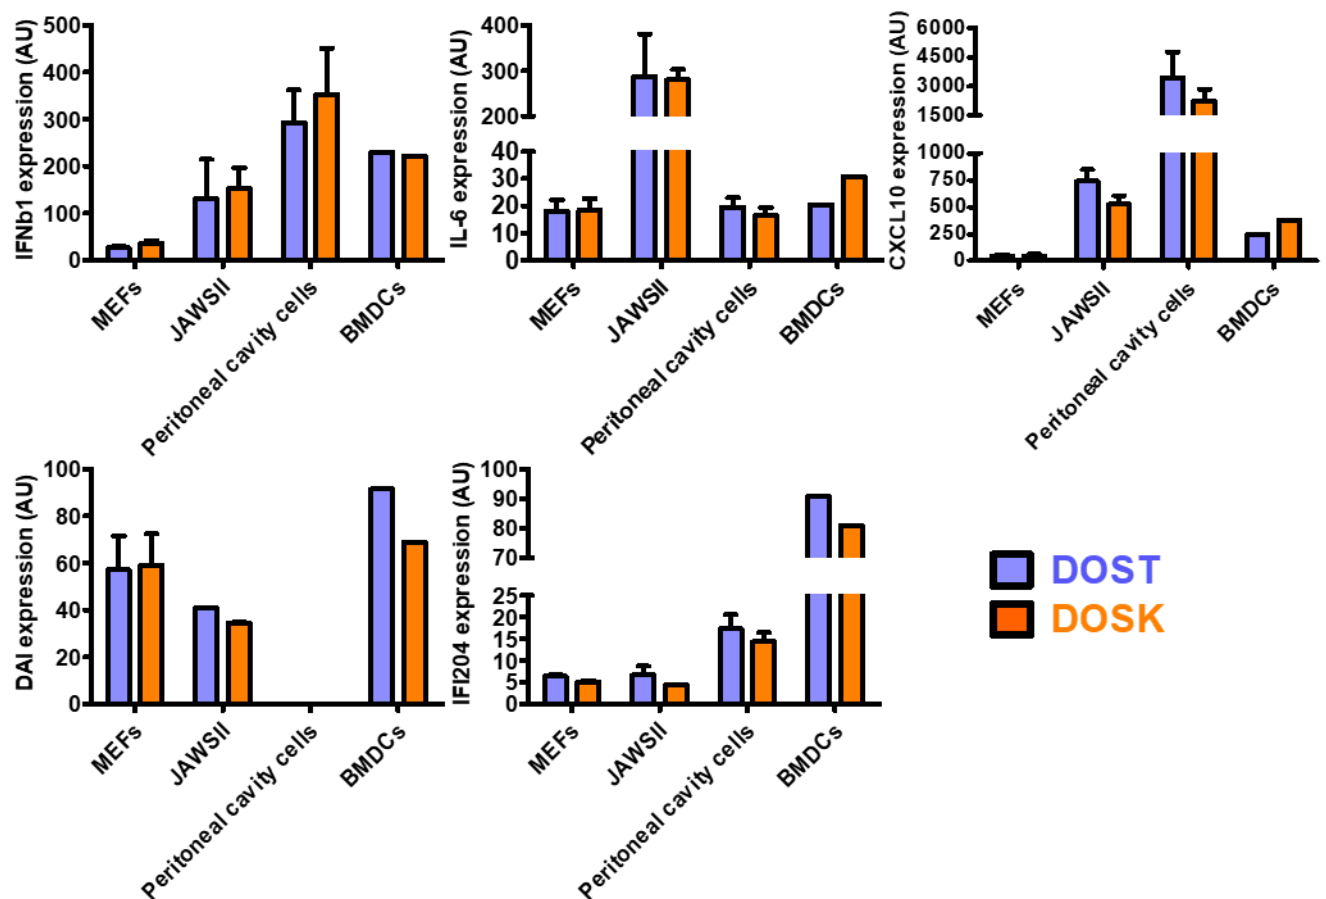

**Figure S4. DOST and DOSK activate innate immune response on a wide panel of cells.** MEFs, JAWSII, peritoneal cavity cells and BMDCs (n=4) were incubated for 24 hours with DOST and DOSK at a concentration of 10  $\mu$ g/mL. Cytokine (IFN $\beta$ 1 and IL-6), chemokine (CXCL10) and DNA sensor (DAI and IFI204) expression levels into cells were determined by RT-qPCR analysis, normalized against the expression levels of HPRT (housekeeping gene) and compared to non-treated cells (AU=1). Data are expressed as the  $2^{-\Delta\Delta CT}$  formula and are shown as mean  $\pm$  SEM.

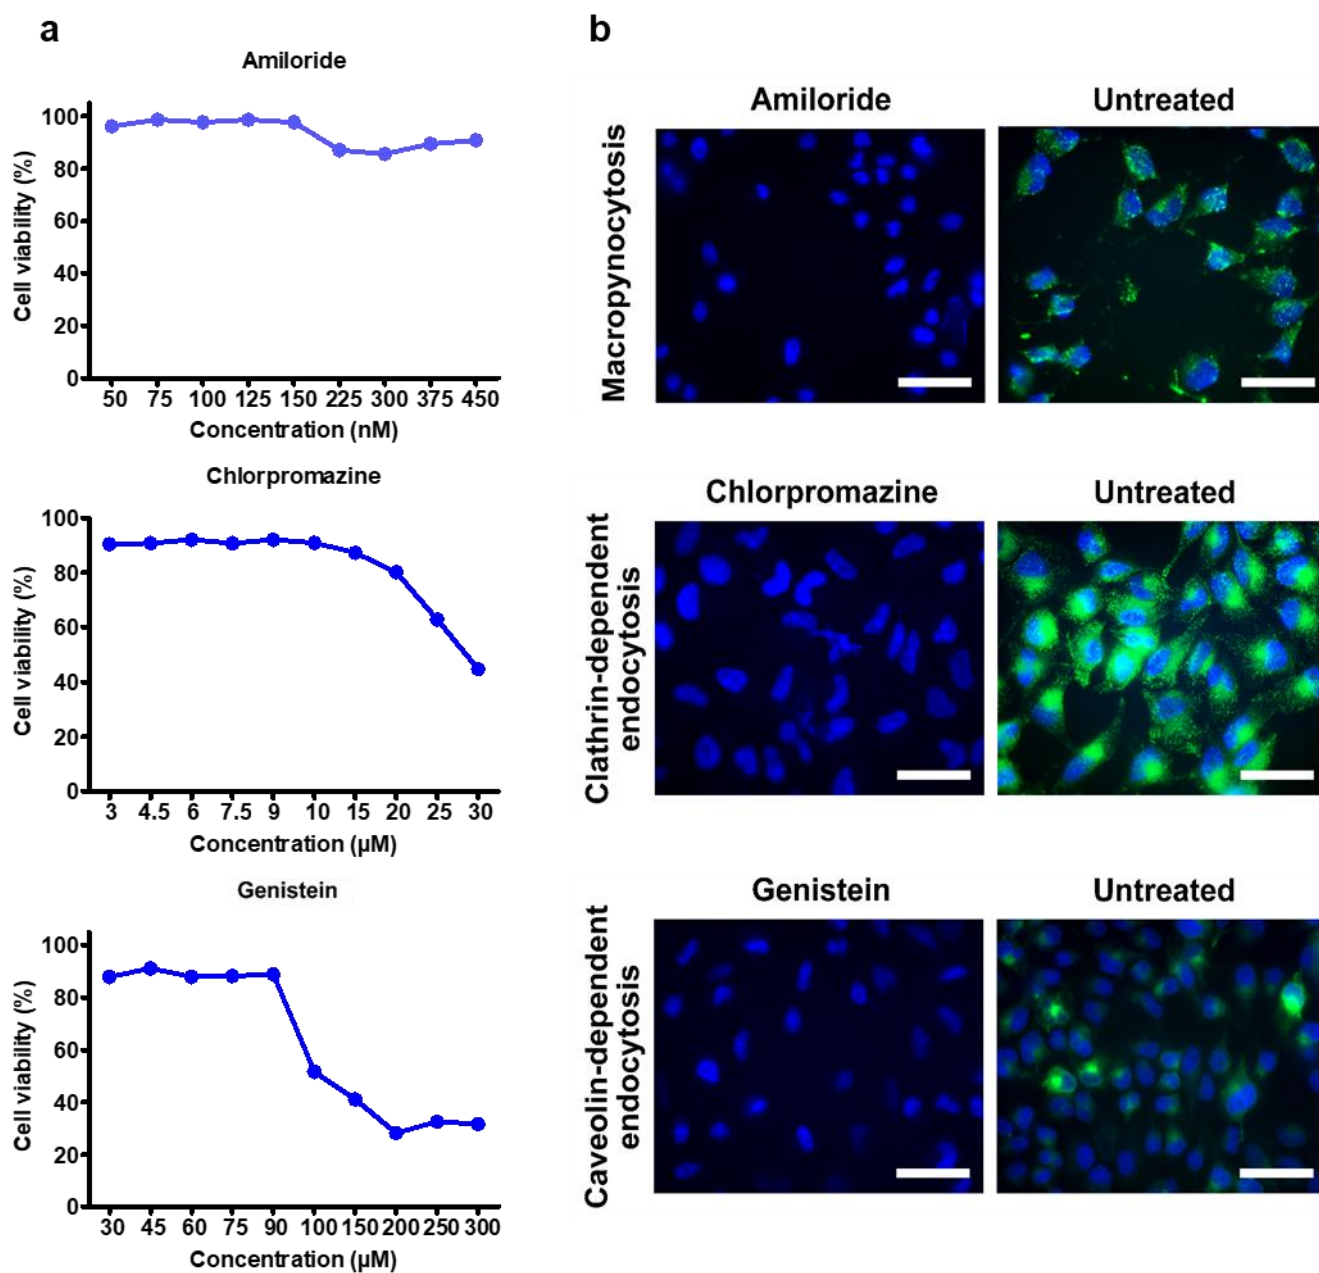

**Figure S5. Validation of endocytosis inhibitors efficacy.** (a) Percentage cell survival of C2C12 cells. Mouse myoblast cells ( $n=4$ ) were treated with various concentration of amiloride (50 to 450 nM), chlorpromazine (3 to 30  $\mu\text{M}$ ), and genistein (30 to 300  $\mu\text{M}$ ) for 24 hours. Cell viability was evaluated using the Cell Titer 96 Non-Radioactive Cell Proliferation Assay. (b) Endocytosis inhibition by fluorescence microscopy. Macropinocytosis inhibition was confirmed by monitoring FITC-Dextran internalization by C2C12 cells in presence or

absence of 150nM of amiloride. Clathrin-dependent endocytosis inhibition was confirmed by monitoring FITC-transferrin internalization by C2C12 cells in the presence or absence of 9 $\mu$ M of chlorpromazine. Caveolin-dependent endocytosis inhibition was confirmed by monitoring bodipy-LacCer internalization by C2C12 cells in presence or absence of 90 $\mu$ M of Genistein. Blue = DAPI staining. Pictures are representative of n=5 samples. Scale bare = 25 $\mu$ m.

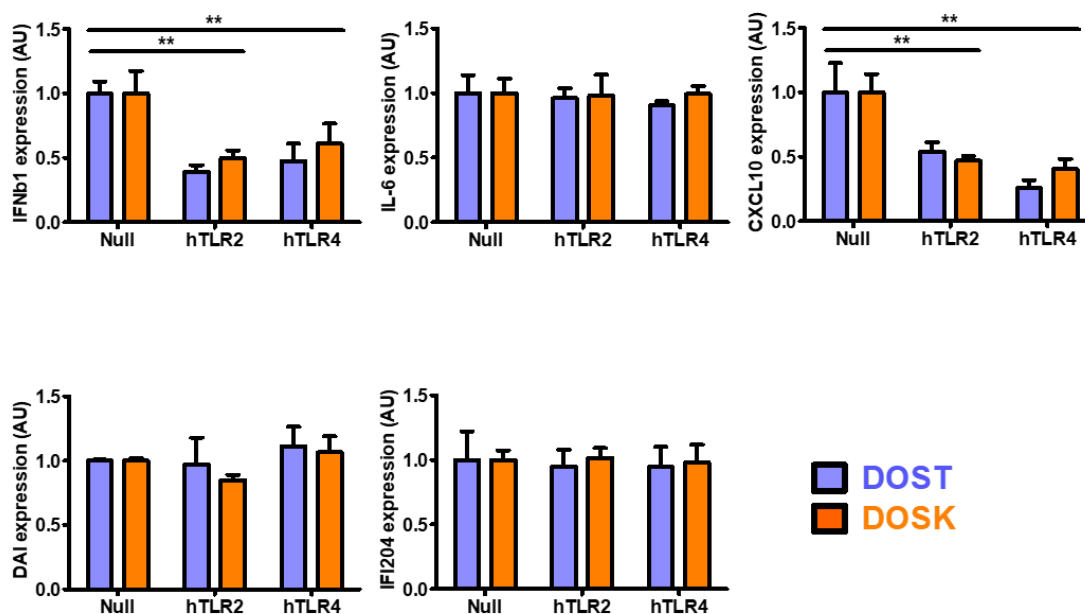

**Figure S6. TLR2 and 4 decrease DOST and DOSK immunostimulatory properties.**

TLR2/4-negative HEK293 cells (null), or HEK293 cells expressing human TLR2 (hTLR2) or TLR4 (hTLR4) (n=4) were incubated for 24 hours with 10 $\mu$ g/ml of DOST (blue) or DOSK (orange). Cytokine (IFN $\beta$ 1 and IL-6), chemokine (CXCL10) and DNA sensor (DAI and IFI204) expression levels in cells were determined by RT-qPCR analysis, normalized against the expression levels of HPRT (housekeeping gene) and compared to TLR2/4-negative HEK293 cells (null) (AU=1). Values are shown as mean  $\pm$  SEM. Data were analyzed using Mann-Whitney test, \*p<0.05, \*\*p<0.01.
